# Supplementary figures and images for: Extended Prophylactic Antibiotics for Mastectomy with Immediate Breast Reconstruction: A Meta-analysis
Source: PubMed Central journal article supplement — Plast Reconstr Surg Glob Open. 2020 Jan 27;8(1):e2613. doi: 10.1097/GOX.0000000000002613 (PMC7015589; doi:10.1097/gox.0000000000002613), 2020-01-27

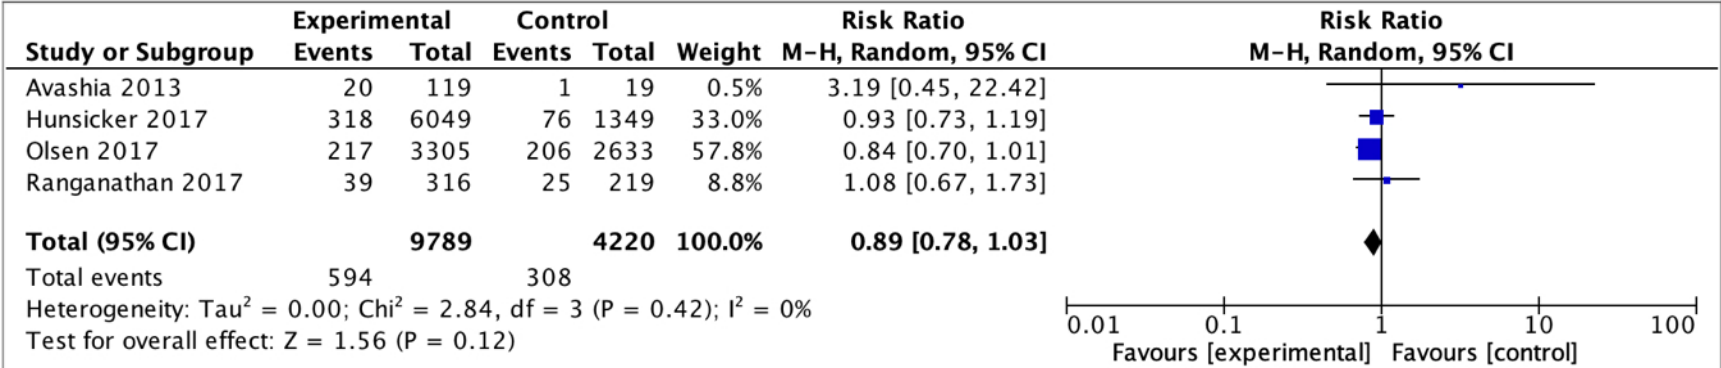

Supplement: gox-8-e2613-s001.pdf [file gox-8-e2613-s001.pdf]

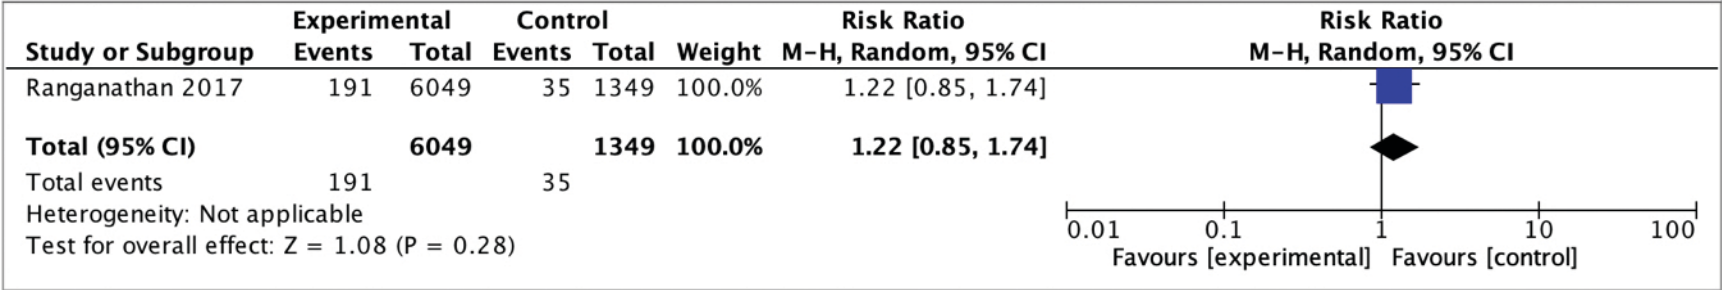

Supplement: gox-8-e2613-s002.pdf [file gox-8-e2613-s002.pdf]

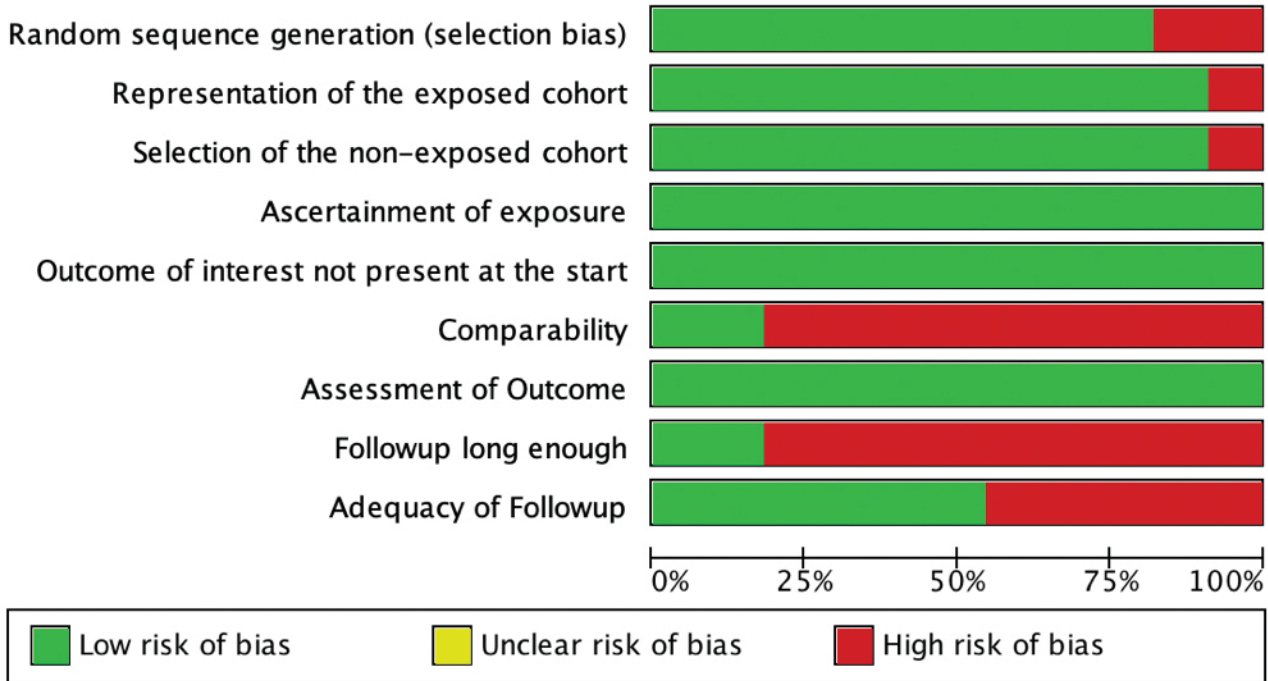

Supplement: gox-8-e2613-s003.pdf [file gox-8-e2613-s003.pdf]

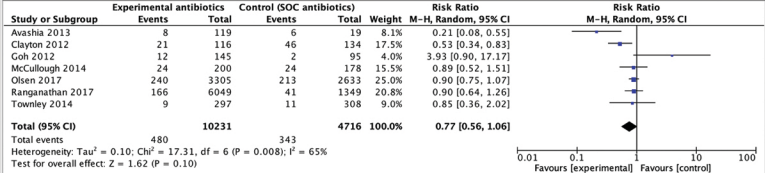

Supplement: gox-8-e2613-s004.pdf [file gox-8-e2613-s004.pdf]

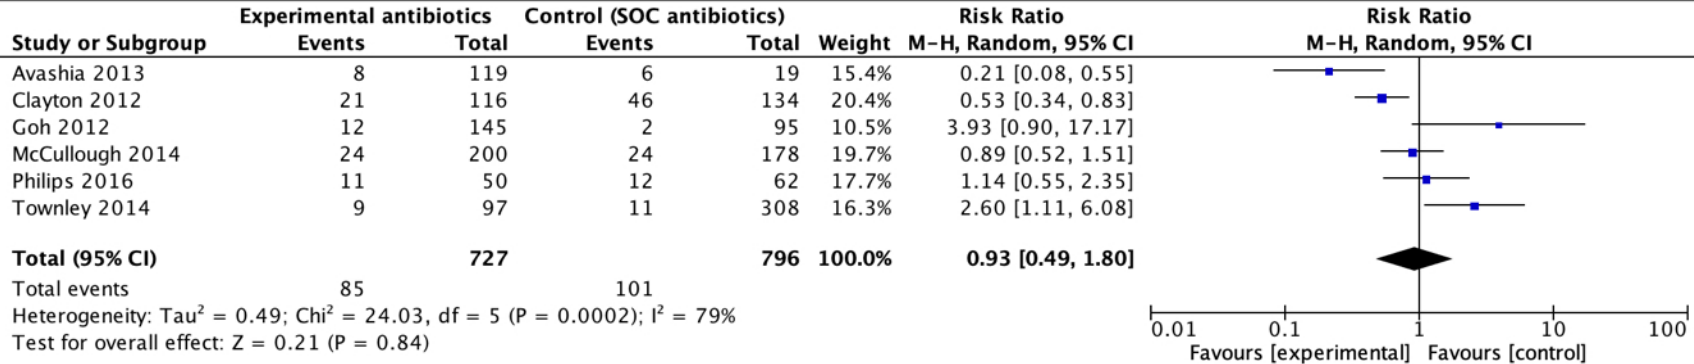

Supplement: gox-8-e2613-s005.pdf [file gox-8-e2613-s005.pdf]
